# Supplementary material for: A Novel In Situ Dendritic Cell Vaccine Triggered by Rose Bengal Enhances Adaptive Antitumour Immunity
Source: Hindawi journal article supplement (doi:10.1155/2022/1178874), 2022-02-01
Supplement: f1 [file 1178874.f1.docx]

***Supplementary Material***

**
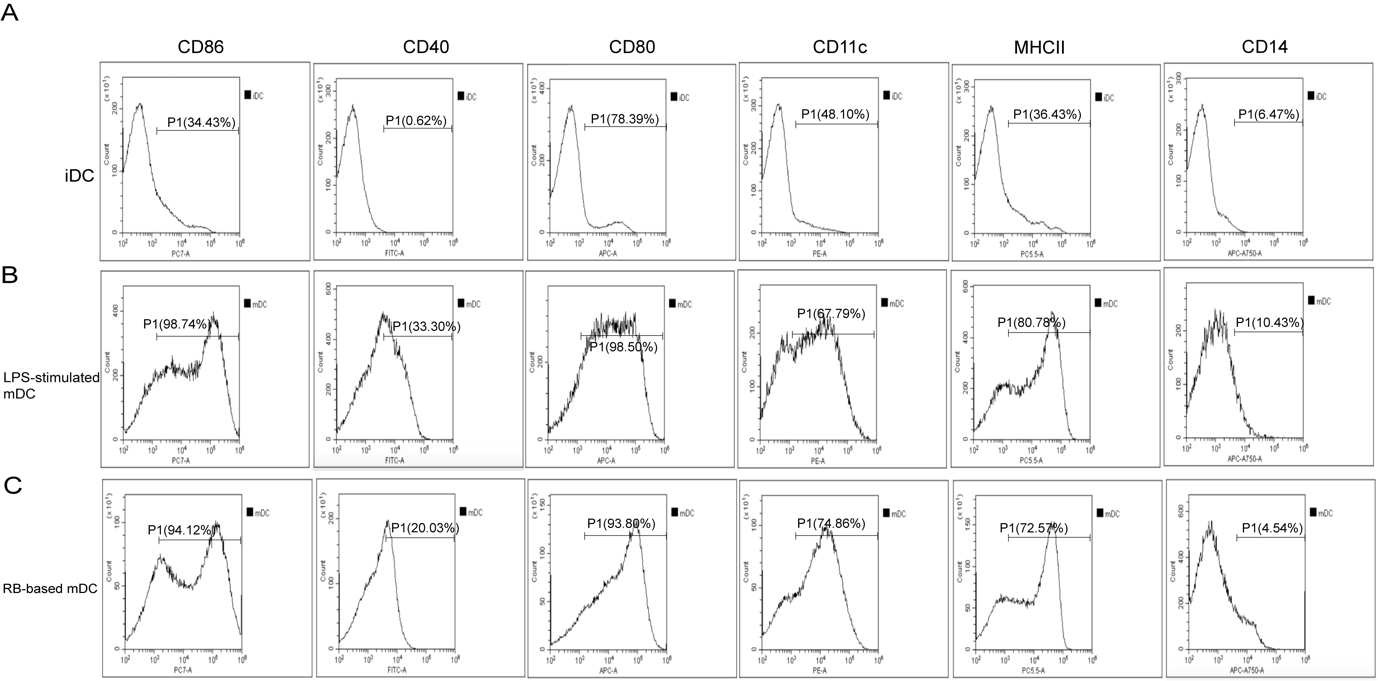
**

Supplementary Figure 1. A representative histogram from a single experiment shows the expression of CD80, CD86, CD40, MHC class II, CD11C and CD14 after the indicated treatment. The percentage of positive cells was shown according to the FMO control. On day 6, iDCs were collected and cultured with LLCs treated with RB for 69 h. The results are shown as “RB-based mDC”. As a positive control, iDCs were stimulated with LPS for 24 h. The results are shown as “LPS-stimulated mDC”. And iDCs without stimulation were shown as a negative control.

**
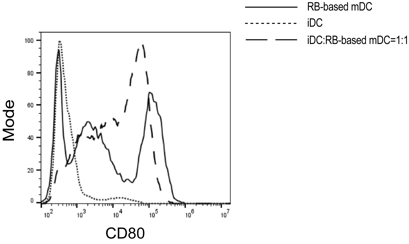
**

Supplementary Figure 2. A representative histogram from a single experiment shows the expression of CD80 after the indicated treatment. The percentage of positive cells was shown according to the FMO control. On day 6, 1×106 iDCs were collected and cocultured with 1×106 RB-based mDCs for 69 h. The results are shown as “iDC:RB-based mDC=1:1”. iDCs and RB-based mDCs were used as negative control and positive control, respectively.


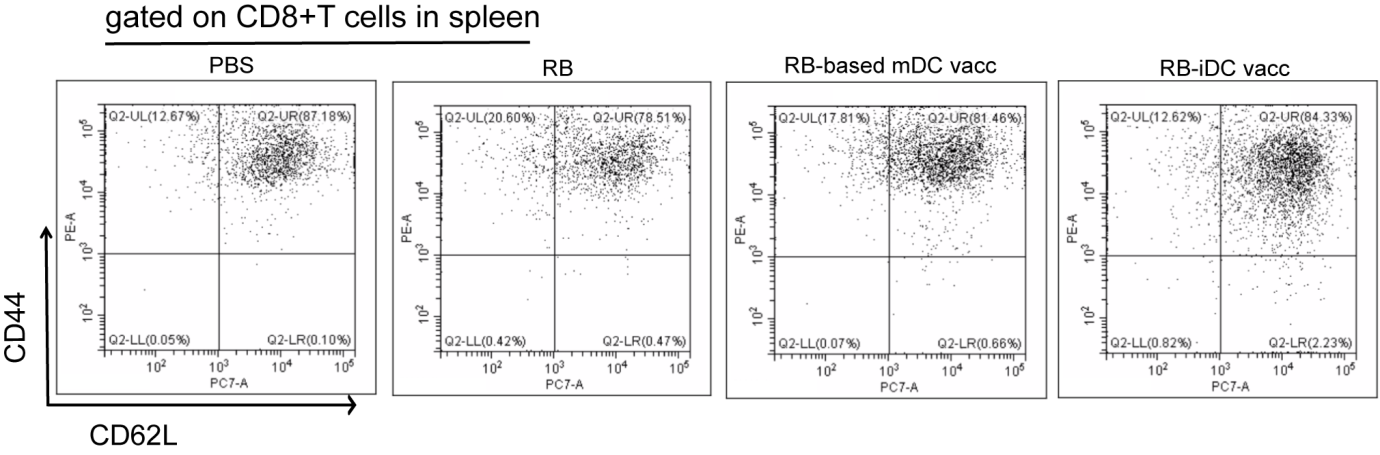


Supplementary Figure 3. T cells analyses were based on CD8, CD44 and CD62L. Different types of T cells were gated on CD8+ T cells. T central memory cells (Tcms) were identified as CD8+CD44+CD62L+, T effector memory cells (Tems) were identified as CD8+CD44+CD62L-, and T memory stem cells (Tscms) and Naïve T cells (Tn)(Tscm+Tn) were identified as CD8+CD44-CD62L+. Representative flow cytometric analysis of the percentages of Tem, Tcm and Tn+Tscm in spleen of mice after receiving different treatments was shown.

**
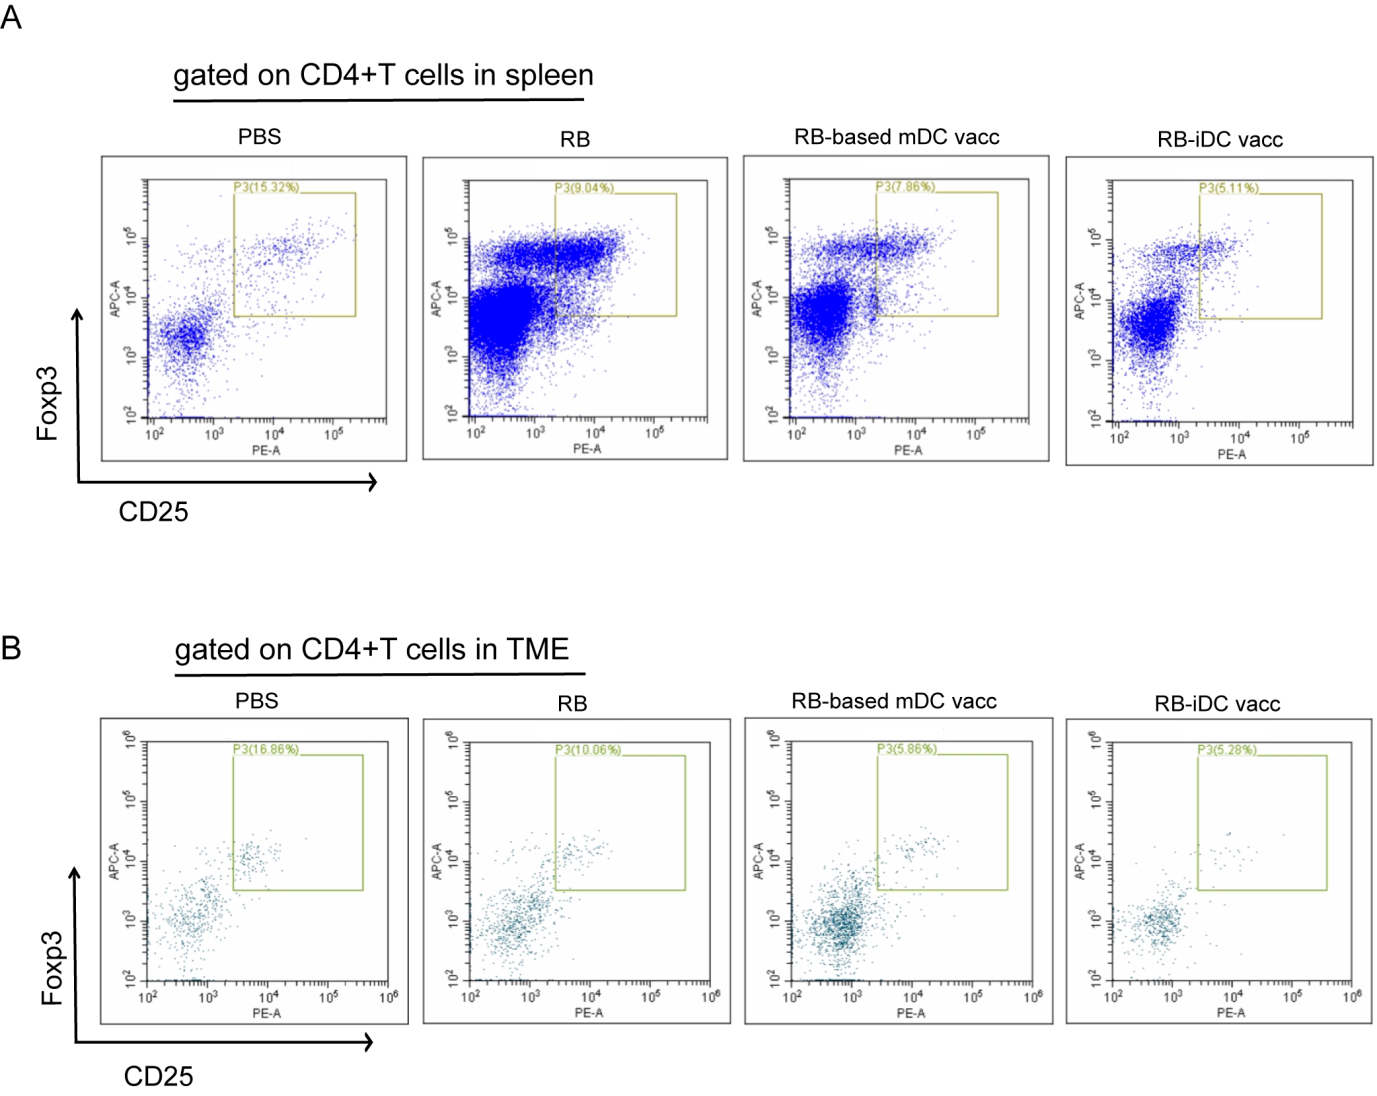
**

Supplementary Figure 4. Treg was identified as CD4+CD25+Foxp3+. CD25+Foxp3+ T cells were gated on CD4+ T cells. Representative flow cytometric analysis of the percentage of Tregs in the spleen (A) and TME (B) of mice after receiving different treatments.

**
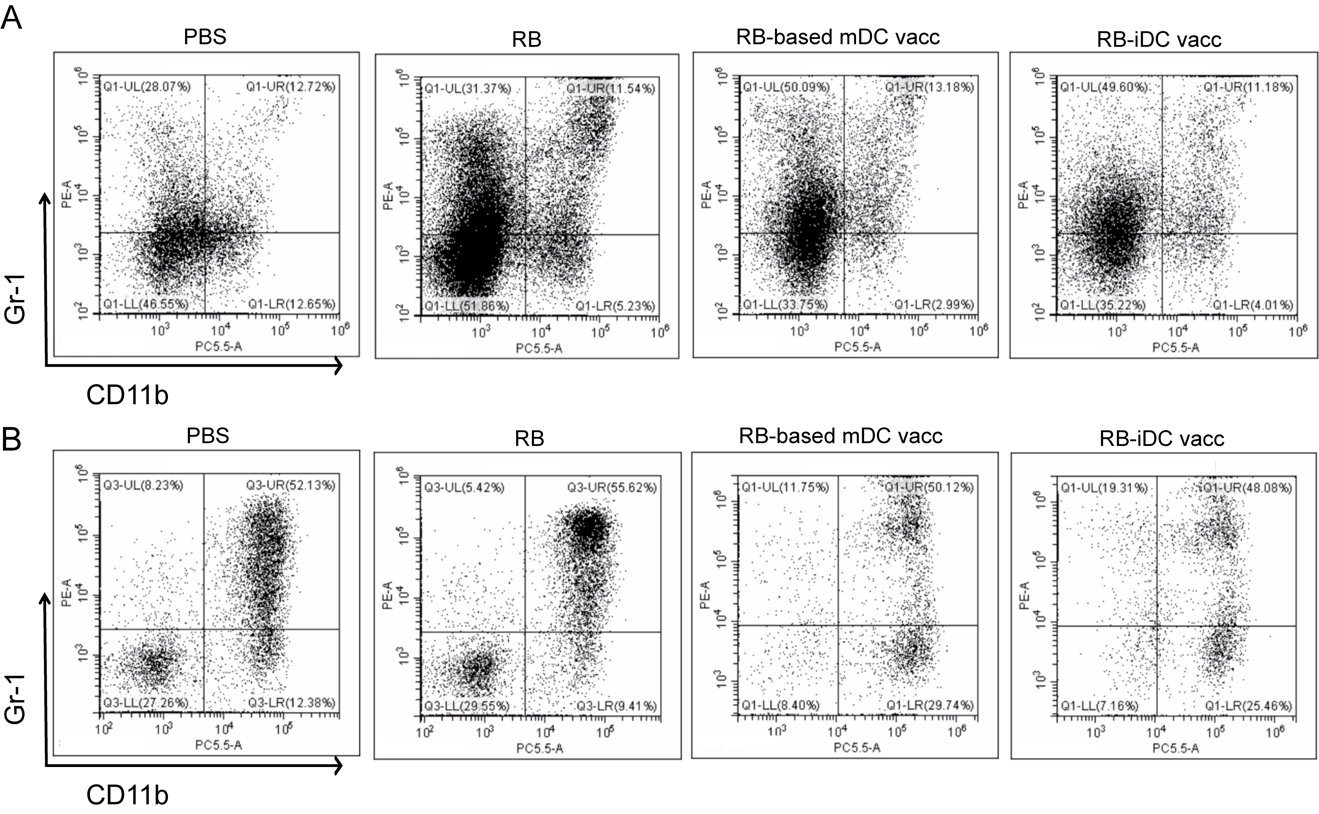
**

Supplementary Figure 5. MDSC was identified as CD11b+Gr-1+. Representative flow cytometric analysis of the percentage of MDSCs in the spleen (A) and TME (B) of mice after receiving different treatments.


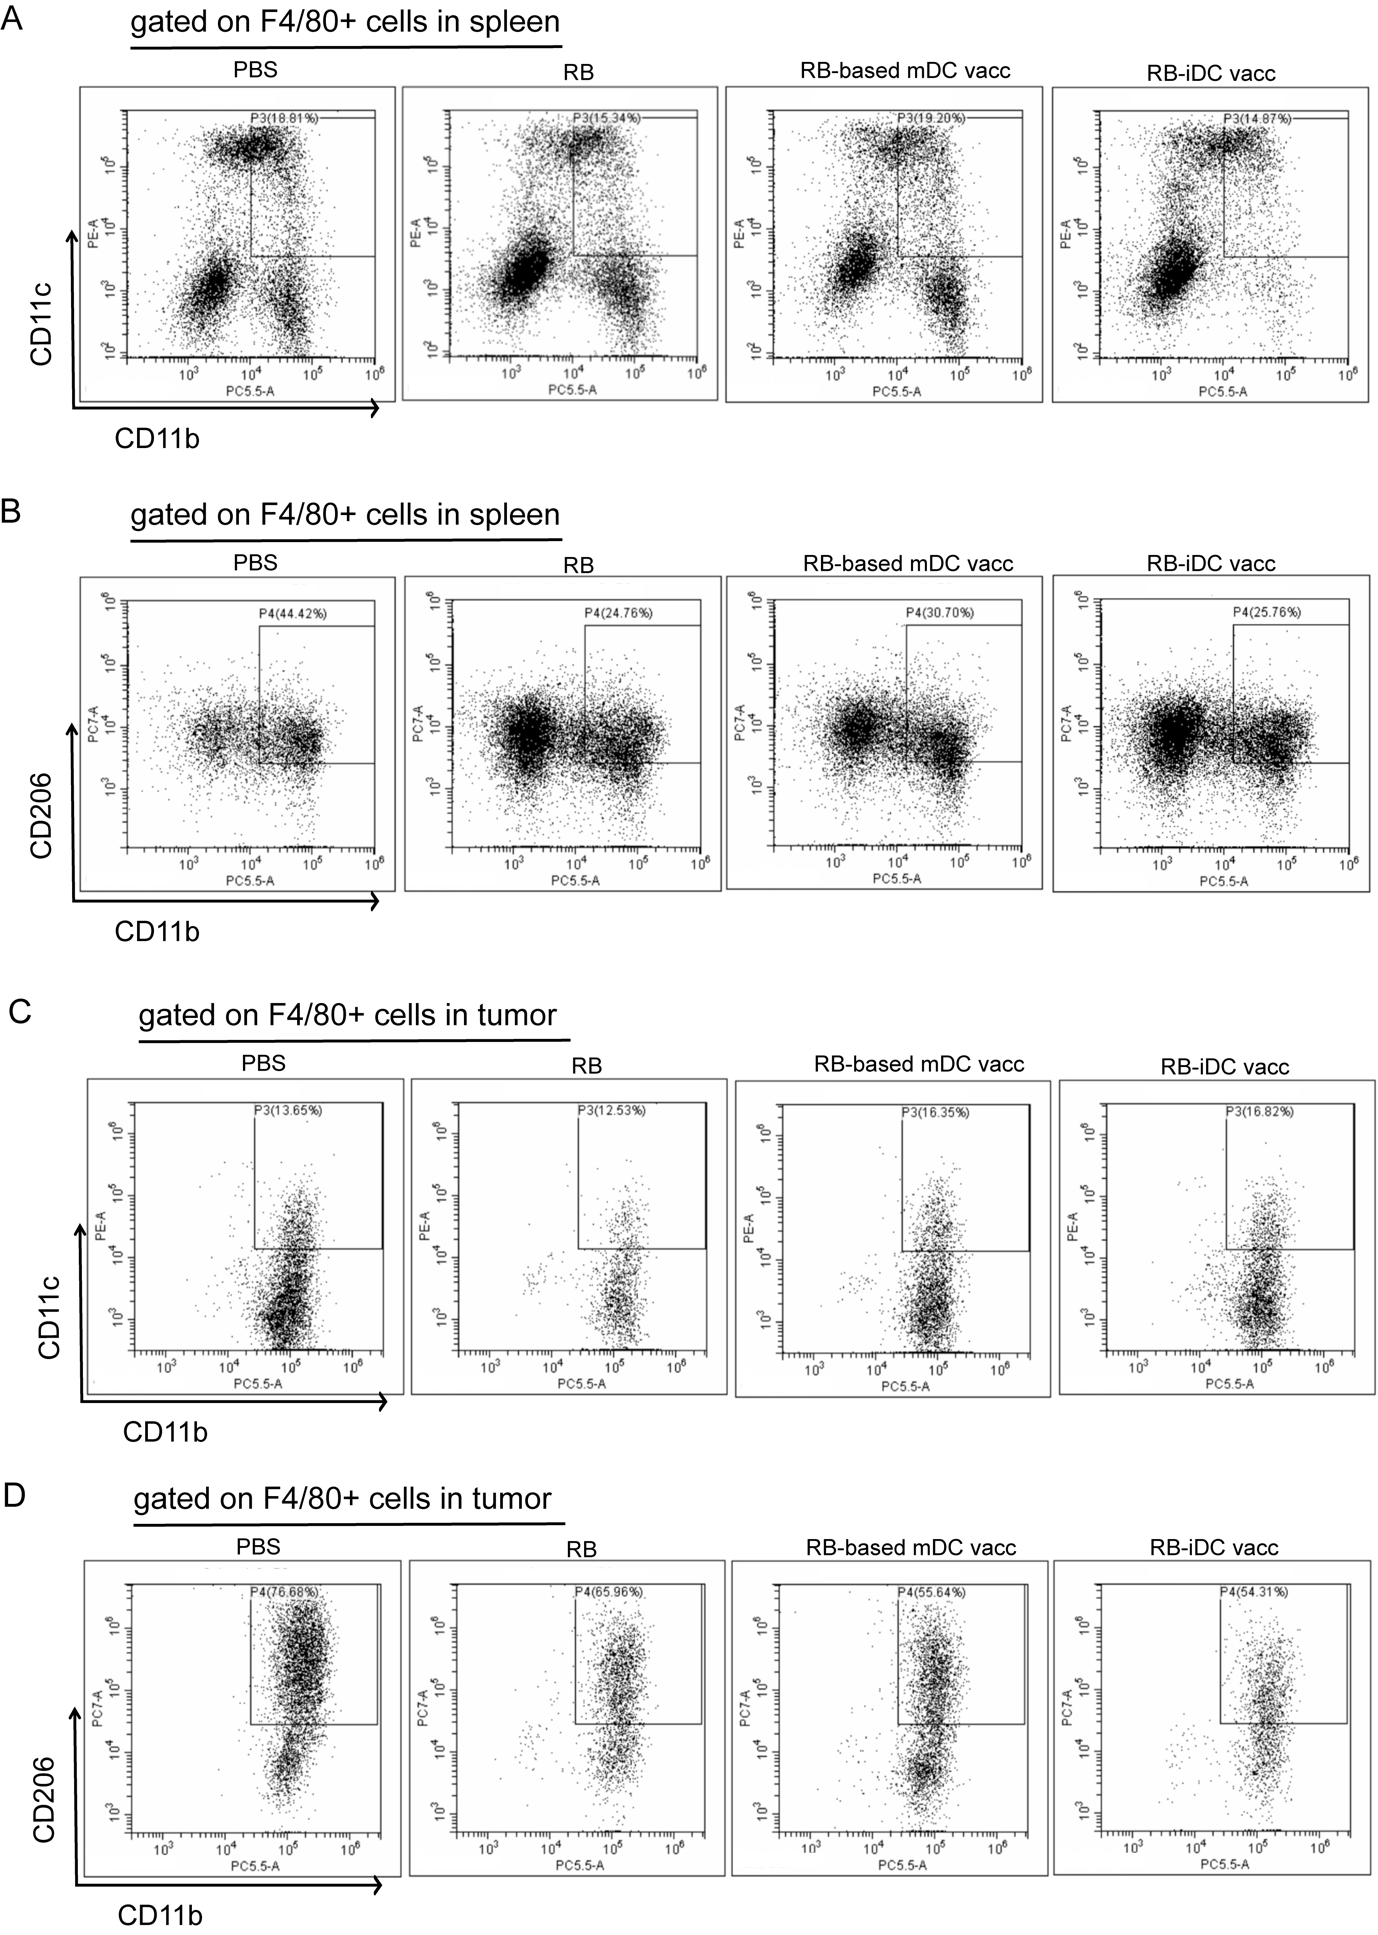


Supplementary Figure 6.

M1 macrophages were identified as F4/80+CD11b+CD11c+, and M2 macrophages were identified as F4/80+CD11b+CD206+. Representative flow cytometric analysis of the percentages of M1 and M2 macrophages in the spleen **(A-B)** and TME **(C-D)** of mice after receiving different treatments.
